# Supplementary material
Source: publisher figshare collection journal article supplement (https://rs.figshare.com/ndownloader/files/6971933)
Supplement: Supplementary file 1 [file 6971933]

## **ELECTRONIC SUPPLEMENTARY MATERIAL**

### **Using avian functional traits to assess the impact of land-cover change on ecosystem processes linked to resilience in tropical forests**

**Authors:** Tom P. Bregman, Alexander C. Lees, Hannah E. A. MacGregor, Bianca Darski, Nárgila G. de Moura, Alexandre Aleixo, Jos Barlow, Joseph A. Tobias

Correspondence to: [tpbregman@gmail.com](mailto:tpbregman@gmail.com); [j.tobias@imperial.ac.uk](mailto:j.tobias@imperial.ac.uk)

## **Expanded Methods**

### *Study design*

Data were collected in two study regions: the municipality of Paragominas (1.9 Mha) and parts of the municipalities of Santarém, Mojuí dos Campos and Belterra (~1 Mha). These two regions are situated in different areas of endemism (Belém and Tapajós, respectively). They also differ in their histories of human occupation and use. The city of Santarém was founded in 1661, and northern Santarém municipality has been densely settled by small-scale farmers for more than a century. In contrast, Paragominas was founded in 1959 and the municipality had a very low population density prior to its colonization by cattle ranchers in the 1950s and 1960s, and the boom in the timber industry during the 1980s and 1990s. Large-scale, mechanized agriculture became established in both regions only in the early 2000s, and has increased rapidly in recent years, currently occupying approximately 40,000 and 60,000 ha in Santarém and Paragominas, respectively.

Fieldwork was coordinated by a research consortium of 30 institutions and partner organisations (Gardner et al. 2013) in the Sustainable Amazon Network (RAS; <http://www.redeamazoniasustentavel.org>), a multi-disciplinary initiative assessing the sustainability of land-use systems in the Brazilian Amazon. The RAS sampling design is based on a sample of 18 third- or fourth-order hydrological catchments (c. 5000 ha) in each region, which were delineated using a digital elevation model and SWAT (Soil and Water Assessment Tool) for ARCGIS 9.3. Catchments are distributed over a gradient of forest cover in 2009 (10–100% in Santarém; 6–100% in Paragominas) with detailed ecological information collected from study transects and individual farms within each catchment. The 36 study catchments were selected to capture the full deforestation gradient, including all

current land-use practices and major soil types. For lists of species identified, and links to digital vouchers supporting identifications, see Lees et al. (2012; 2013).

Ecological data were collected from a sample of 300 m study transects in every catchment, distributed using a stratified-random sampling design, where a standard density of transects (1 per 400 ha) was distributed across the catchment in proportion to the percentage cover of total forest and production areas. For example, if half of the landscape was covered by forest, then half of the transects were allocated to forest. In catchments with very low levels of forest cover we sampled additional forest transects to ensure a minimum sample of three transects in all catchments. Within each of these two land-use categories (forest and non-forest), sample transects were distributed randomly with a minimum separation of 1500 m to minimize spatial dependence. The use of this stratified-random sampling design provided a balance between the need for: (1) proportional sampling of forest and non-forest areas, and a sufficient density and coverage of sample points to capture major differences in landscape structure and composition among different catchments; and (2) a well-dispersed set of sampling points across forest and non-forest areas that captured important environmental heterogeneities within each catchment and across the region as a whole, helping to minimize problems of pseudoreplication. The final distribution of sampling points among habitat categories is presented in Moura et al. (2013).

#### *Land-cover categories*

Transects were classified *a posteriori* into five land-cover types, using 2010 Landsat images and a decision tree classification algorithm (Gardner et al. 2013), as (i) primary forest—the region’s original climax physiognomy that has never been cleared for agriculture, and for which no recent evidence of logging or fire events was

detected; (ii) disturbed forest—primary forests that have never been clear-felled but have suffered recent logging or fire events; (iii) secondary forests—forests that have developed after complete clearance; (iv) pasture and (v) arable—typically soybean fields or rice. We subdivided primary forests into (i) and (ii) based on 20 year chronosequence of Landsat images for each transect, calibrated by interviews with local farmers, as well as our own ground-truthed surveys. The former remote sensing analysis was carried out using a time series of georeferenced 30-m spatial resolution Landsat images from 1990–2010 in Santarém, and from 1988 to 2010 in Paragominas. Images were first corrected for atmospheric haze and smoke interference and then classified using a decision tree algorithm (see Gardner et al. 2013). The ground-truthed survey included a combination of physical evidence of selective logging (debris and stumps) and understory fires (charcoal and fire scars on stems found during field surveys) (see Berenguer et al. 2014).

### *Environmental variables*

Vegetation surveys for all woody plants (trees and lianas) and palms above 10 cm DBH (Diameter at Breast Height) were conducted in 10 x 250 m plots, subdivided into 10 x (10 x 15 m) parcels. Smaller individuals (2.5 to 10 cm DBH) were sampled in five subplots of 5 x 20 m. All individuals were identified to species or morphospecies level with herbarium samples collected wherever appropriate. Along each forest transect, 5 hemispherical photos were taken at a 50 m intervals in order to determine the canopy openness of each area. The camera was placed 1 m from the ground and faced north. Canopy openness was determined with the software Gap LightAnalyzer 2.0 (Frazer et al. 1999) which calculates the percentage of the canopy covered by trees crowns.

### *Bird surveys*

Birds provide a useful system for understanding how complex tropical forest ecosystems respond to landscape disturbance for two main reasons. First, they are the best-known class of organisms, with comprehensive datasets available on ecological roles and interspecific variation on their life histories (Vandewalle et al. 2010). Second, they are relatively time- and cost-effective to sample (Gardner et al. 2008).

We surveyed birds at all main study transects. In each transect, three point count stations were located at 0, 150 and 300 m. We carried out six surveys per transect (two repetitions of three 15 minute, 75 m fixed-width surveys). Repetitions were carried out within the same week but not on the same day; all species identified were recorded. Fieldwork in Paragominas was carried out by A.C.L. and N.G.M. between 28 July and 20 November 2010 and then again from 18 to 29 May 2011. Fieldwork in Santarém was conducted by A.C.L., N.G.M., Christian Borges Andretti and Bradley J.W. Davis from 16 October 2010 to 8 February 2011. All observers had extensive experience of conducting bird surveys in Brazil. Point counts were recorded with solid state recorders to facilitate identification of bird calls which were not identified in the field. Surveys were not carried out on days with persistent rain and/or strong winds. If a species' identification was ever in doubt playbacks were used to lure the vocalizing bird for visual confirmation. Playbacks were not used systematically to increase the detectability of any given species during the point count surveys. Any effect of seasonality (presence/absence of austral/boreal migrants, fluctuations in vocalization activity, etc.) was minimized by systematically rotating surveys between catchments of varying total forest cover and between habitat types.

All bird surveys in dense tropical forest suffer from the problem imperfect detection because some species are far less detectable than others, particularly by

sight. We have minimised this problem by ensuring that all surveys were conducted by experienced fieldworkers skilled at identifying avian acoustic signals. Detection of bird species by songs and calls is standard in tropical forests, and around 90% of our survey detections were auditory rather than visual, reducing the potential bias caused by reliance on visual detection. Another potential bias relates to sampling intensity as our sampling regime resulted in fewer surveys undertaken in open habitats. However, reduced sampling is offset by increased detectability of bird species in open habitats which means that a similar proportion of resident species can be detected with fewer survey visits. In support of this view, we note that relatively few species were excluded from analyses because of their rarity in non-forest land-cover (see Dataset 1, sheet 3), and that species accumulation curves indicate that surveys were near-asymptotic in all habitats (Moura et al. 2013).

#### *Biometric traits*

We compiled a functional trait dataset from museum specimens collected as near as possible to the study localities. We took seven morphometric measurements from all specimens: beak length, width and depth, wing length, Kipp's distance (the distance between the tip of the longest primary/wing tip and the first secondary feather measured on the folded wing), tail length and tarsus length.

The rationale for selecting these measurements was as follows. Beak size and shape predict the size and type of food items selected by birds (Wheelright 1985; Miles et al. 1987) and thus provide a long-established index of dietary niche (Schoener 1965; Hsu et al. 2014; Tobias et al. 2014). Similarly, tarsus, tail, and wing length are locomotory traits associated with substrate use and foraging manoeuvre (Miles and Ricklefs 1984; Miles et al. 1987; Tobias et al. 2014). Finally, Kipp's

distance gives further insight into wing shape and flight ability, thus providing information about dispersal limitation and gap-crossing ability (Dawideit et al. 2009; Lees and Peres 2009; Claramunt et al. 2012).

All three beak measurements were taken at or from the anterior edge of the nostrils: (1) width, (2) length to the tip of the beak and (3) depth (as vertical height). Wing length was the distance between the carpal joint and the wing tip of the unflattened wing. Kipp's distance was measured from the tip of the first secondary and the tip of the longest primary on the closed wing. Tail length was taken from the point at which the two central rectrices meet the skin to the tip of the longest rectrix. Tarsus length was measured from the middle of the rear ankle joint, i.e. the notch between the tibia and tarsus, to the end of the last scale of the acrotarsium. All measurements were taken with digital callipers to the nearest 0.01 mm, apart from wing length and tail length, which were measured using an end-ruler to the nearest mm.

To account for intra-specific variability, we aimed to measure at least two males and two females for each species. This was not possible for 48 monomorphic species (12% of total) lacking four specimens of known sex, so in these cases we included unsexed specimens where necessary. On average, we measured  $5.6 \pm 2.8$  specimens per species ( $3.0 \pm 2.2$  males;  $2.4 \pm 0.9$  females;  $1.9 \pm 1.1$  unsexed). We generated a mean value for each morphological trait by averaging data across all (male, female and unsexed) specimens for each species. Most specimens were accessed in the Museu Paraense Emílio Goeldi, Belém, Brazil ( $n = 1399$  specimens) to ensure that the phenotypes measured were sampled in the same region as our bird surveys. Gaps were filled using specimens stored at the Natural History Museum, Tring, UK ( $n = 394$  specimens), as well as smaller samples of specimens at the

Lousiana State University Museum of Zoology and the American Museum of Natural History. Full details of the sex, locality, source and acquisition numbers for specimens used in this study are presented in Dataset 1 (sheet 2).

### *Habitat classification*

Within the tropics, species occurring in more structurally dense habitats (e.g. forest) are expected to be less dispersive than more open-habitat specialists (e.g. grassland) (Weir et al. 2009). Empirical studies show that forest species may fail to cross even narrow breaks in habitat easily crossed by open country species (Moore et al. 2008; Lees and Peres 2009). This is thought to occur both because of the behavioral inhibition of forest species to cross gaps (Harris and Reed 2002) and because the adaptations required for movement amongst dense vegetation (e.g. short and rounded wings) are not favourable for long distance flight (Stratford and Robinson 2005). Species were assigned to one of two habitat categories according to whether they are (i) regularly detected in forest or (ii) almost exclusively restricted to non-forested habitats, following Bregman et al. (2014). We defined forest as any type of evergreen or deciduous woodland lacking gaps between tree canopies.

### *Analyses*

To quantify the functional trait structure of avian communities, we used Functional Diversity (FD) and Functional Dispersion ( $F_{DIS}$ ) because they focus on different components of community structure. The key difference is that  $FD$  is the sum of branch lengths of a given trait or set of traits, whereas  $F_{DIS}$  is the mean distance of all species to the community mean trait value. Branch lengths are calculated from a dendrogram of trait similarity (Petchey and Gaston 2002). This means that  $FD$  is



strongly correlated with species richness, whereas  $F_{DIS}$  is not (Laliberte and Legendre 2010). We retain  $FD$  because it is a standard measure in the literature and performs relatively well in simulations (Kraft and Ackerly 2010), and we add  $F_{DIS}$  as an additional measure because it has the advantage of being more sensitive to changes in the overall spread, or ‘dispersion’ of traits (Laliberte and Legendre 2010).

All analyses were conducted in *R* (R Development Core Team 2014). Both functional diversity metrics were calculated using species presence-absence data:  $FD$  was calculated using the ‘*Picante*’ package (Kembel et al. 2010);  $F_{DIS}$  was calculated using the ‘*FD*’ package (Laliberte and Legendre 2010); GLMMs were fitted using the ‘*glmmADMB*’ package (Skaug et al. 2011).

## Expanded Discussion

The results of mean community trait analyses can be interpreted in the light of specific changes in community composition. For example, we found that the beaks of forest and non-forest species were on average shorter, wider and deeper in disturbed habitats (figure S2c). Among insectivores, we attribute this shift to the loss of species with long and slender beaks (e.g. *Campylorhamphus*, *Galbula*), and the prevalence of species with shorter, wider beaks (e.g. *Stelgidopteryx*), whereas for frugivores it can perhaps be explained by the predominance of oscine passerines (e.g. *Thraupis*, *Euphonia*) in agricultural landscapes.

Our results revealed that the locomotory trait (tarsus:tail/wing ratio) decreased for forest insectivores in degraded habitats (figure S2d), again suggesting a shift in the dominant foraging behaviour within communities. Community-wide changes in locomotory traits are presumably driven by the loss of terrestrial and semi-terrestrial insectivores (e.g. *Sclerurus*, *Formicarius*) with long legs and short wings, and

colonisation by vagile arboreal or open country insectivores (e.g. *Tyrannus*) with short legs and long wings (Barlow et al. 2006). In frugivores, a similar decrease in the locomotory trait of non-forest species with disturbance (figure S2h) is largely driven by the loss of ground-dwelling frugivores (e.g. *Psophia*), and the persistence of canopy frugivores.

Mean hand-wing index increases across the disturbance gradient, particularly for forest insectivores (figure S2b) and non-forest frugivores (figure S2f). This suggests that better dispersers typically dominate communities in degraded forests and agricultural areas. Forest insectivores, in particular, are often highly dispersal-limited, with many species unable or unwilling to make prolonged flights across open areas (Moore et al. 2008, Lees and Peres 2009). These species have smaller hand-wing index, and tend to suffer both increased extinction and reduced likelihood of subsequent recolonisation in fragmented or degraded forests (Canaday 1996, Stratford and Stouffer 1999, Sekercioglu et al. 2002, Lees and Peres 2008, Tobias et al. 2013).

### *Limitations*

One limitation of this study is the lack of temporal replication. Fluctuations in species richness and abundance over time are widespread in nature (Boulinier et al. 1998) but adequate time series for communities remain rare (Debinski and Holt 2000). We note that further changes in bird community structure and composition are perhaps likely in our system because land-cover change in parts of these landscapes has been a relatively recent phenomenon (Gardner et al. 2013), suggesting that many communities still owe an extinction debt (Tilman et al. 1994, Wearn et al. 2012). Thus, even if bird communities are currently capable of maintaining ecosystem function, local extinctions may further reduce functionality in future.

## References

- Bregman, T. P., C. H. Sekercioglu, and J. A. Tobias. 2014. Global patterns and predictors of bird species responses to forest fragmentation: Implications for ecosystem function and conservation. *Biological Conservation* **169**: 372–383.
- Claramunt, S., E. P. Derryberry, J. V. Remsen, and R. T. Brumfield. 2012b. High dispersal ability inhibits speciation in a continental radiation of passerine birds. *Proceedings of the Royal Society B-Biological Sciences* **279**: 1567–1574.
- Dawideit, B. A., A. B. Phillimore, I. Laube, B. Leisler, and K. Bohning-Gaese. 2009. Ecomorphological predictors of natal dispersal distances in birds. *Journal of Animal Ecology* **78**: 388–395.
- Frazer, G.W., Canham, C.D. Lertzman, K.P. 1999 Gap Light Analyzer (GLA), Version 2.0: Imaging software to extract canopy structure and gap light transmission indices from true-colour fisheye photographs. Users manual and program documentation. Simon Fraser University, Burnaby, British Columbia, and the Institute of Ecosystem Studies, Millbrook, New York.
- Gardner, T.A., Ferreira, J., Barlow, J., Lees, A.C., Parry, L., Vieira, I.C.G., Berenguer, E., Abramovay, R., Aleixo, A., Andretti, C., Aaragao, L. E. O., Araujo, I., Souza de Avila, W., Bardgett, R.D., Batistella, M., Begotti, R.A., Beldini, T., Ezzine de Blas, D., Braga, R.F., de Lima Braga, D., de Brito, J.G., de Camargo, P.B., Campos dos Santos, F., Campos de Oliveira, V., Cordeiro, A.C.N., Cardoso, T.M., de Carvalho, D.R., Castelani, S.A., Chaul, J.C.M., Cerri, C.E., De Assis Costa, F., da Costa, C.D.F., Coudel, E., Coutinho, A.C., Cunha, D., D'Antona, A., Dezincourt, J., Dias-Silva, K., Durigan, M., Esquerdo, J.C.D., Feres, J., de Barros Ferraz, S.F., de Melo Ferreira, A.E., Fiorini, A.C., da Silva, L.V.F., Frazao, F.S., Garrett, R., dos Santos Gomes, A., da Silva Goncalves, K., Guerrero, J.B., Hamada, N., Hughes, R. M., Iglori, D.C., da Conceição Jesus, E., Juen, L., Junior, M., de Oliveira Junior, J.M.B., de Oliveira Junior, R.C., Junior, C.S., Kaufmann, P., Korasaki, V., Leal, C.G., Leitao, R., Lima, N., de Fatima Lopes Almeida, M., Lourival, R., Louzada, J., Mac Nally, R.C., Marchand, S., Maues, M.M., Moreira, F.M.S., Morsello, C., Moura, N., Nessimian, J., Nunes, S., Oliveira, V. H.F., Pardini, R., Pereira, H. C., Pompeu, P.S.,

Ribas, C.R., Rossetti, F., Schmidt, F. A., da Silva, R., da Silva, R.C.V., da Silva, T.F.M., Silveira, J., Siqueira, J.V., de Carvalho, T.S., Solar, R.R.C., Tancredi, N.S.H., Thomson, J.R., Torres, P.C., Vaz-de-Mello, F.Z., Veiga, R.C.S., Venturieri, A., Viana, C., Weinhold, D., Zanetta, R., Zuanon, J. 2013. A social and ecological assessment of tropical land uses at multiple scales: the Sustainable Amazon Network. *Phil. Trans. R. Soc. B*, **368**: 20120166.

Harris, R.J., Reed, J.M., 2002. Behavioral barriers to nonmigratory movements of birds. *Annales Zoologici Fennici* **39**: 275–290.

Hsu, Y., P. Shaner, C. Chang, L. Ke, and S. Kao. 2014. Trophic niche width increases with bill size variation in a generalist passerine: a test of niche variation hypothesis. *Journal of Animal Ecology* **83**: 450–459.

Kembel, S. W., P. D. Cowan, M. R. Helmus, W. K. Cornwell, H. Morlon, D. D. Ackerly, S. P. Blomberg, and C. O. Webb. 2010. Picante: R tools for integrating phylogenies and ecology. *Bioinformatics* **26**: 1463–1464.

Kraft, N. J. B., and D. D. Ackerly. 2010. Functional trait and phylogenetic tests of community assembly across spatial scales in an Amazonian forest. *Ecological Monographs* **80**: 401–422.

Laliberte, E. and P. Legendre. 2010. A distance-based framework for measuring functional diversity from multiple traits. *Ecology* **91**: 299–305.

Lees, A. C., N. G. de Moura, C. B. Andretti, B. J. W. Davis, E. V. Lopes, L. M. P. Henriques, A. Aleixo, J. Barlow, J. Ferreira, and T. A. Gardner. 2013. One hundred and thirty-five years of avifaunal surveys around Santarem, central Brazilian Amazon. *Revista Brasileira De Ornitologia* **21**: 16–57.

Lees, A. C., N. G. de Moura, A. Santana, A. Aleixo, J. Barlow, E. Berenguer, J. Ferreira, and T. A. Gardner. 2012. Paragominas: a quantitative baseline inventory of an eastern Amazonian avifauna. *Revista Brasileira De Ornitologia* **20**: 93–118.

Lees, A. C., and C. A. Peres. 2009. Gap-crossing movements predict species occupancy in Amazonian forest fragments. *Oikos* **118**: 280–290.

- Lockwood, R., J. P. Swaddle, and J. M. V. Rayner. 1998. Avian wingtip shape reconsidered: wingtip shape indices and morphological adaptations to migration. *Journal of Avian Biology* **29**: 273–292.
- Miles, D. B., and R. E. Ricklefs. 1984. The correlation between ecology and morphology in deciduous forest passerine birds. *Ecology* **65**: 1629–1640
- Miles, D. B., R. E. Ricklefs, and J. Travis. 1987. Concordance of ecomorphological relationships in 3 assemblages of passerine birds. *American Naturalist* **129**: 347–364.
- Moore, R. P., W. D. Robinson, I. J. Lovette, and T. R. Robinson. 2008. Experimental evidence for extreme dispersal limitation in tropical forest birds. *Ecology Letters* **11**: 960–968.
- Moura, N. G., A. C. Lees, C. Andretti, B. J. W. Davis, R. Solar, A. Aleixo, J. Barlow, J. Ferreira, and T. A. Gardner. 2013. Avian biodiversity in multiple-use landscapes of the Brazilian Amazon. *Biological Conservation* **167**: 339–348.
- Petchey, O. L. and K. J. Gaston. 2002. Functional diversity (FD), species richness and community composition. *Ecology Letters* **5**: 402–411.
- R Core Development Team. 2014. R: A language and environment for statistical computing. R Foundation for Statistical Computing, Vienna, Austria.
- Schoener, T.W. 1965 The evolution of bill size differences among sympatric congeneric species of birds. *Evolution* **19**: 189–213
- Skaug, H., D. Fournier, A. Nielsen, A. Magnusson, and B. Bolker. 2011. glmmADMB: Generalised linear mixed models using AD model builder. R package version 0.5–2/r122.
- Stratford, J. A. and W. D. Robinson. 2005. Gulliver travels to the fragmented tropics: geographic variation in mechanisms of avian extinction. *Front Ecol. Environ.* **3**: 91–98.
- Tobias, J. A., C. K. Cornwallis, E. P. Derryberry, S. Claramunt, R. T. Brumfield, and N. Seddon. 2014. Species coexistence and the dynamics of phenotypic evolution in adaptive radiation. *Nature* **506**: 359–363.

Weir, J.T., Bermingham, E., Schluter, D., 2009. The Great American Biotic Interchange in birds. *Proc. Natl. Acad. Sci. USA* **106**: 21737–21742.

Wheelwright, N. T. 1985. Fruit size, gape width, and the diets of fruit-eating birds. *Ecology* **66**: 808–818.

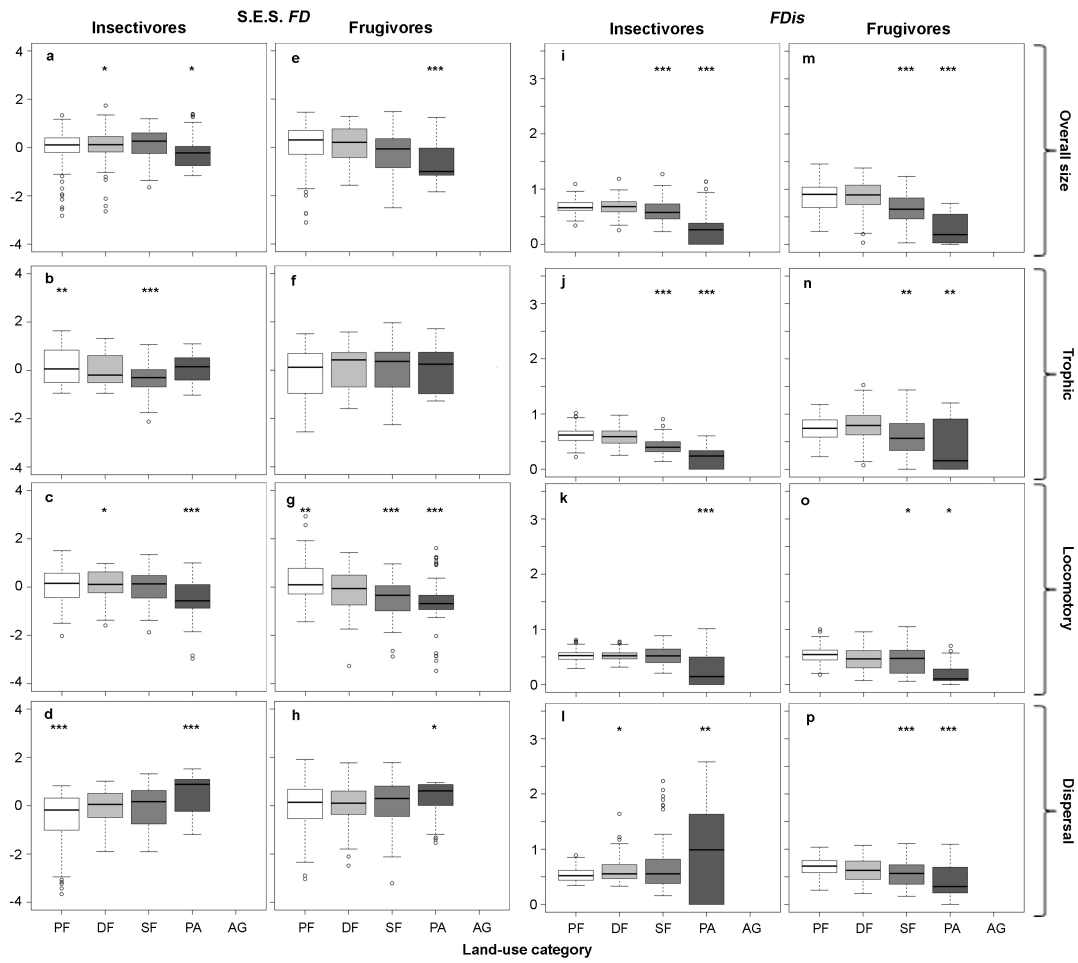

**Figure S1.** Standardized effect size (SES) of Functional Diversity ( $FD$ ) and functional dispersion ( $F_{DIS}$ ) for four functional traits of forest insectivores (a–d, i–l) and frugivores (e–h, m–p) in 330 avian communities across five land uses: primary forest (PF), disturbed primary forest (DF), secondary forest (SF), pasture (PA) and arable agriculture (AG). Data from Santarém and Paragominas are pooled. Asterisks indicate that observed  $FD$  was significantly different from null expectations, or that observed  $F_{DIS}$  was significantly different from the primary forest  $F_{DIS}$  (\* <0.05, \*\* <0.01, \*\*\* <0.001). All statistical results are from two-tailed Wilcoxon signed-ranks tests.

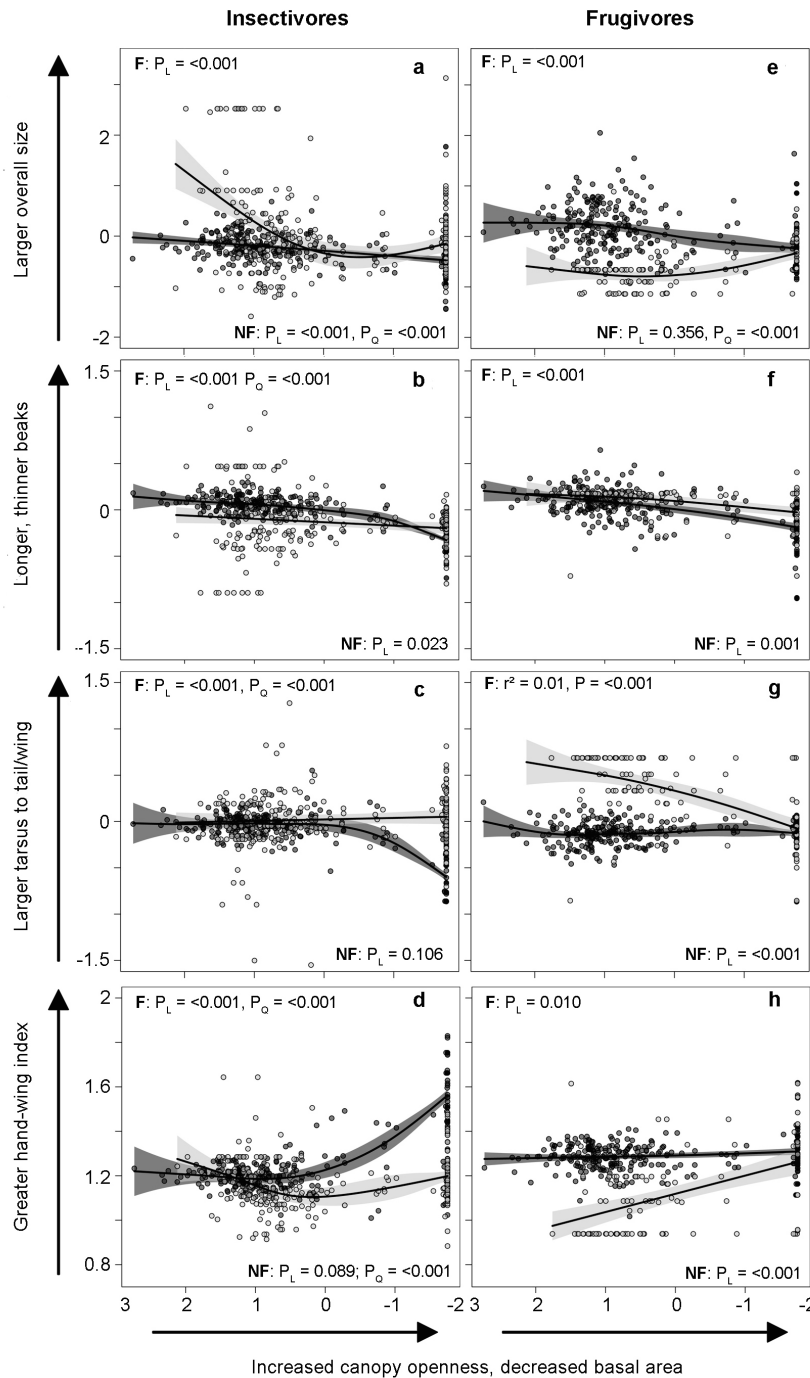

**Figure S2.** Change in functional traits in 330 avian communities distributed across a land-use gradient for insectivores (a–d) and frugivores (e–h). Forest species (8 models) are shown in dark grey; non-forest species (8 models) in light grey (lines show model fit from Generalised Additive Modelling; shaded areas show standard error  $\pm 1.96$  S.E). All data were derived from principal component analyses; see the electronic supplementary material, table S3.4, S3.5 and S3.12. Significance ( $P$ ) values for linear ( $P_L$ ) and quadratic ( $P_Q$ ) forms of the environmental PC axis are from Generalised Linear Modelling (see table S13 for more details).



**Table S1** Principal Component Analysis (PCA) for insectivorous birds showing Eigenvalues and the proportion of variance explained. PC1 from both trophic and locomotory trait analyses were combined in a secondary PCA to create an axis representing overall body size. The second PC for both trophic and locomotory traits captured variation independent of body size.

| Functional trait | PC | Proportion variance | PCA loadings  |                |            |
|------------------|----|---------------------|---------------|----------------|------------|
|                  |    |                     | Tarsus length | Tail length    | Wing chord |
| Locomotory       | 1  | 0.695               | 0.471         | 0.604          | 0.642      |
|                  | 2  | 0.237               | 0.864         | -0.464         | -0.197     |
|                  |    |                     | Beak length   | Beak width     | Beak depth |
| Trophic          | 1  | 0.790               | 0.532         | 0.593          | 0.604      |
|                  | 2  | 0.154               | 0.842         | -0.446         | -0.304     |
|                  |    |                     | Trophic PC1   | Locomotory PC1 |            |
| Body size        | 1  | 0.812               | 0.707         | 0.707          |            |

**Table S2** Principal Component Analysis (PCA) for frugivorous birds showing Eigenvalues and the proportion of variance explained. PC1 from both trophic and locomotory trait analyses were combined in a secondary PCA to create an axis representing overall body size. The second PC for both trophic and locomotory traits captured variation independent of body size.

| Functional trait | PC | Proportion variance | PCA loadings  |                |            |
|------------------|----|---------------------|---------------|----------------|------------|
|                  |    |                     | Tarsus length | Tail length    | Wing chord |
| Locomotory       | 1  | 0.847               | 0.560         | 0.565          | 0.606      |
|                  | 2  | 0.119               | 0.726         | -0.687         | -0.458     |
| Trophic          |    |                     | Beak length   | Beak width     | Beak depth |
|                  | 1  | 0.931               | 0.567         | 0.590          | 0.574      |
|                  | 2  | 0.056               | 0.760         | -0.108         | -0.641     |
| Body size        |    |                     | Trophic PC1   | Locomotory PC1 |            |
|                  | 1  | 0.686               | 0.707         | 0.707          |            |

**Table S3** Results of Principal Component Analysis (PCA) for environmental variables (mean canopy openness and mean basal area). Eigenvalues and the proportion of variance explained are presented for PC1 and PC2.

| PC                         |   | Proportion<br>variance | PCA Loadings            |                    |
|----------------------------|---|------------------------|-------------------------|--------------------|
|                            |   |                        | Mean canopy<br>openness | Mean basal<br>area |
| Environmental<br>variables | 1 | 0.924                  | -0.707                  | 0.707              |
|                            | 2 | 0.076                  | 0.707                   | 0.707              |

**Table S4** Differences in *FD* of insectivore and frugivore communities, comparing between all combinations of land-use categories: primary forest (PF), disturbed primary forest (DF), secondary forest (SF), pasture (PA) and agriculture (AG). Analyses are two-tailed Wilcoxon tests.

| Group      | Land use | Insectivores |                   | Frugivores |                   |
|------------|----------|--------------|-------------------|------------|-------------------|
|            |          | <i>V</i>     | Wilcoxon <i>P</i> | <i>V</i>   | Wilcoxon <i>P</i> |
| All        | PF vs DF | 3695         | 0.742             | 4148       | 0.082             |
|            | PF vs SF | 4515         | <b>&lt;0.001</b>  | 4075       | <b>&lt;0.001</b>  |
|            | PF vs PA | 6055         | <b>&lt;0.001</b>  | 5311       | <b>&lt;0.001</b>  |
|            | PF vs AG | 2185         | <b>&lt;0.001</b>  | –          | –                 |
|            | DF vs SF | 3511         | <b>&lt;0.001</b>  | 2732       | <b>0.013</b>      |
|            | DF vs PA | 4688         | <b>&lt;0.001</b>  | 3686       | <b>&lt;0.001</b>  |
|            | DF vs AG | 1679         | <b>&lt;0.001</b>  | –          | –                 |
|            | SF vs PA | 2606         | 0.056             | 2772       | <b>&lt;0.002</b>  |
|            | SF vs AG | 1238         | <b>&lt;0.001</b>  | –          | –                 |
|            | PA vs AG | 1447         | <b>&lt;0.001</b>  | –          | –                 |
| Forest     | PF vs DF | 3917         | 0.307             | 4029       | 0.171             |
|            | PF vs SF | 4901         | <b>&lt;0.001</b>  | 4026       | <b>&lt;0.001</b>  |
|            | PF vs PA | 4641         | <b>&lt;0.001</b>  | 5383       | <b>&lt;0.001</b>  |
|            | PF vs AG | –            | –                 | –          | –                 |
|            | DF vs SF | 3654         | <b>&lt;0.001</b>  | 2684       | <b>0.023</b>      |
|            | DF vs PA | 3540         | <b>&lt;0.001</b>  | 3805       | <b>&lt;0.001</b>  |
|            | DF vs AG | –            | –                 | –          | –                 |
|            | SF vs PA | 2611         | <b>&lt;0.001</b>  | 2853       | <b>&lt;0.001</b>  |
|            | SF vs AG | –            | –                 | –          | –                 |
|            | PA vs AG | –            | –                 | –          | –                 |
| Non-forest | PF vs DF | 313          | 0.549             | –          | –                 |
|            | PF vs SF | 404          | 0.846             | –          | –                 |
|            | PF vs PA | 330          | <b>0.002</b>      | –          | –                 |
|            | PF vs AG | 245          | 0.175             | –          | –                 |
|            | DF vs SF | 1029         | 0.466             | –          | –                 |
|            | DF vs PA | 787          | <b>&lt;0.001</b>  | –          | –                 |
|            | DF vs AG | 613          | <b>0.048</b>      | –          | –                 |
|            | SF vs PA | 735          | <b>&lt;0.001</b>  | –          | –                 |
|            | SF vs AG | 622          | 0.232             | –          | –                 |
|            | PA vs AG | 1461         | <b>&lt;0.001</b>  | –          | –                 |

**Table S5** Comparison of *FD* in disturbed habitats relative to primary forest for insectivore and frugivore communities. Analyses are two-tailed Wilcoxon tests (i.e. testing whether the observed values are significantly different from the null expectation in either direction). Bold denotes significant differences. The standardised effect size (SES) is provided along with the standard error (SE). Analyses were run separately for individual functional traits in different land-use categories: primary forest (PF), disturbed primary forest (DF), secondary forest (SF), pasture (PF) and agriculture (AG). The number of communities statistically different from the null expectation are given (with the total number of communities for each test in brackets). Sample size can differ within categories because guild communities sometimes contained too few species to be included in analyses.

| Group      | Land use | Insectivores    |                                        |          |                   | Frugivores      |                                        |          |                   |
|------------|----------|-----------------|----------------------------------------|----------|-------------------|-----------------|----------------------------------------|----------|-------------------|
|            |          | SES (mean + SE) | No. communities < expectation (sample) | <i>N</i> | Wilcoxon <i>P</i> | SES (mean + SE) | No. communities < expectation (sample) | <i>N</i> | Wilcoxon <i>P</i> |
| All        | PF       | 0.046 (0.665)   | 33 (97)                                | 2757     | 0.172             | 0.083 (0.863)   | 43 (97)                                | 2717     | 0.221             |
|            | DF       | 0.073 (0.567)   | 26 (74)                                | 1670     | 0.129             | 0.027 (0.859)   | 44 (74)                                | 1418     | 0.872             |
|            | SF       | -0.162 (0.573)  | 34 (59)                                | 670      | 0.105             | -0.211 (0.809)  | 41 (59)                                | 541      | <b>0.010</b>      |
|            | PA       | 0.015 (0.589)   | 40 (74)                                | 1487     | <b>0.594</b>      | -0.288 (0.645)  | 50 (59)                                | 357      | <b>&lt;0.001</b>  |
|            | AG       | 0.167 (0.693)   | 8 (23)                                 | 178      | 0.235             | —               | —                                      | —        | —                 |
| Forest     | PF       | -0.043 (0.725)  | 55 (97)                                | 2248     | 0.645             | 0.024 (0.796)   | 49 (97)                                | 2385     | 0.977             |
|            | DF       | 0.061 (0.699)   | 37 (74)                                | 1636     | 0.182             | 0.100 (0.930)   | 37 (74)                                | 1482     | 0.613             |
|            | SF       | -0.195 (0.743)  | 37 (59)                                | 674      | 0.112             | -0.038 (0.868)  | 33 (59)                                | 777      | 0.417             |
|            | PA       | -0.274 (0.553)  | 35 (48)                                | 385      | <b>0.037</b>      | -0.481 (0.465)  | 52 (57)                                | 157      | <b>&lt;0.001</b>  |
|            | AG       | —               | —                                      | —        | —                 | —               | —                                      | —        | —                 |
| Non-forest | PF       | 0.660 (1.446)   | 8 (17)                                 | 104      | 0.207             | —               | —                                      | —        | —                 |
|            | DF       | 0.611 (1.272)   | 17 (41)                                | 591      | <b>0.037</b>      | -0.431 (0.365)  | 7 (8)                                  | 2        | <b>0.023</b>      |
|            | SF       | -0.369 (0.637)  | 34 (46)                                | 211      | <b>&lt;0.001</b>  | -0.356 (0.814)  | 19 (22)                                | 49       | <b>0.010</b>      |
|            | PA       | -0.061 (0.941)  | 43 (74)                                | 1202     | 0.319             | 1.84 (0.789)    | 0 (10)                                 | 55       | <b>0.002</b>      |
|            | AG       | 0.244 (1.097)   | 12 (23)                                | 147      | 0.800             | —               | —                                      | —        | —                 |

**Table S6** Comparison of *FDis* in disturbed habitats relative to primary forest for insectivore and frugivore communities. Analyses are two-tailed Wilcoxon tests (i.e. testing whether the observed values are significantly different from the null expectation in either direction). Bold denotes significant differences. Analyses were run separately for individual trait syndromes in different land-use categories: primary forest (PF), disturbed primary forest (DF), secondary forest (SF), pasture (PF) and agriculture (AG).

| Group      | Land use | Insectivores |                   | Frugivores |                   |
|------------|----------|--------------|-------------------|------------|-------------------|
|            |          | <i>V</i>     | Wilcoxon <i>P</i> | <i>V</i>   | Wilcoxon <i>P</i> |
| All        | PF vs DF | 3150         | 0.172             | 3613       | 0.942             |
|            | PF vs SF | 3670         | <b>0.003</b>      | 4406       | <b>&lt;0.001</b>  |
|            | PF vs PA | 2292         | <b>&lt;0.001</b>  | 6370       | <b>&lt;0.001</b>  |
|            | PF vs AG | 590          | <b>&lt;0.001</b>  | 1135       | <b>&lt;0.001</b>  |
|            | DF vs SF | 2965         | <b>&lt;0.001</b>  | 3328       | <b>&lt;0.001</b>  |
|            | DF vs PA | 1979         | <b>0.004</b>      | 4814       | <b>&lt;0.001</b>  |
|            | DF vs AG | 512          | <b>0.002</b>      | 864        | <b>&lt;0.001</b>  |
|            | SF vs PA | 1008         | <b>&lt;0.001</b>  | 3308       | <b>&lt;0.001</b>  |
|            | SF vs AG | 268          | <b>&lt;0.001</b>  | 649        | <b>&lt;0.001</b>  |
|            | PA vs AG | 653          | 0.053             | 634        | <b>0.003</b>      |
| Forest     | PF vs DF | 2958         | <b>0.049</b>      | 3516       | 0.821             |
|            | PF vs SF | 3148         | 0.296             | 4238       | <b>&lt;0.001</b>  |
|            | PF vs PA | 4615         | <b>&lt;0.001</b>  | 6202       | <b>&lt;0.001</b>  |
|            | PF vs AG | 1643         | <b>&lt;0.001</b>  | 1137       | <b>&lt;0.001</b>  |
|            | DF vs SF | 2649         | 0.035             | 3225       | <b>&lt;0.001</b>  |
|            | DF vs PA | 3579         | <b>&lt;0.001</b>  | 4659       | <b>&lt;0.001</b>  |
|            | DF vs AG | 1252         | <b>&lt;0.001</b>  | 862        | <b>&lt;0.001</b>  |
|            | SF vs PA | 2711         | <b>&lt;0.001</b>  | 3241       | <b>&lt;0.001</b>  |
|            | SF vs AG | 979          | <b>&lt;0.001</b>  | 651        | <b>&lt;0.001</b>  |
|            | PA vs AG | 928          | <b>&lt;0.001</b>  | 613        | <b>0.004</b>      |
| Non-forest | PF vs DF | 812          | <b>0.001</b>      | 126        | <b>0.049</b>      |
|            | PF vs SF | 622          | <b>&lt;0.001</b>  | 144        | <b>0.004</b>      |
|            | PF vs PA | 464          | <b>&lt;0.001</b>  | 138        | <b>0.036</b>      |
|            | PF vs AG | 129.5        | <b>&lt;0.001*</b> | —          | —                 |
|            | DF vs SF | 1515         | 0.768             | 549        | 0.147             |
|            | DF vs PA | 1242         | <b>&lt;0.001</b>  | 461        | 0.758             |
|            | DF vs AG | 315          | <b>&lt;0.001</b>  | —          | —                 |
|            | SF vs PA | 1048         | <b>&lt;0.001</b>  | 848        | 0.322             |
|            | SF vs AG | 278          | <b>&lt;0.001</b>  | —          | —                 |
|            | PA vs AG | 601          | <b>0.018</b>      | —          | —                 |

**Table S7** Comparison of *FD* in disturbed habitats relative to primary forest for insectivore and frugivore communities (all species), with analyses run separately for individual functional traits in different land-cover categories. Analyses are two-tailed Wilcoxon tests (i.e. testing whether observed values are significantly different from the null expectation in either direction). Bold denotes significant differences. The standardised effect size (SES) is provided along with the standard error (SE). Land-cover categories: primary forest (PF), disturbed primary forest (DF), secondary forest (SF), pasture (PF) and agriculture (AG). Sample size differs within categories because guild communities sometimes contained too few species to be included in analyses.

| Functional trait  | Land cover | Insectivores   |                                        |          |                   | Frugivores      |                                        |          |                   |
|-------------------|------------|----------------|----------------------------------------|----------|-------------------|-----------------|----------------------------------------|----------|-------------------|
|                   |            | Mean SES (SE)  | No. communities < expectation (sample) | <i>N</i> | Wilcoxon <i>P</i> | SES (mean + SE) | No. communities < expectation (sample) | <i>N</i> | Wilcoxon <i>P</i> |
| Body size         | PF         | 0.115 (0.597)  | 35 (97)                                | 3109     | <b>0.008</b>      | 0.076 (1.171)   | 30 (97)                                | 3076     | <b>0.012</b>      |
|                   | DF         | 0.089 (0.575)  | 34 (74)                                | 1619     | 0.213             | 0.204 (0.753)   | 22 (74)                                | 1972     | <b>0.002</b>      |
|                   | SF         | -0.064 (0.567) | 32 (59)                                | 815      | 0.600             | -0.327 (1.057)  | 31 (59)                                | 708      | 0.183             |
|                   | PA         | 0.173 (0.378)  | 20 (74)                                | 2131     | <b>&lt;0.001</b>  | -0.646 (0.795)  | 41 (59)                                | 297      | <b>&lt;0.001</b>  |
|                   | AG         | 0.207 (0.633)  | 7 (23)                                 | 184      | 0.170             | -0.210 (1.112)  | 2 (4)                                  | 4        | 0.875             |
| Trophic traits    | PF         | 0.189 (0.576)  | 43 (97)                                | 3439     | <b>&lt;0.001</b>  | -0.053 (0.860)  | 44 (97)                                | 2222     | 0.580             |
|                   | DF         | -0.025 (0.531) | 48 (74)                                | 1401     | 0.944             | 0.083 (0.853)   | 29 (74)                                | 1472     | 0.651             |
|                   | SF         | -0.376 (0.505) | 49 (59)                                | 328      | <b>&lt;0.001</b>  | -0.119 (0.966)  | 26 (59)                                | 766      | 0.371             |
|                   | PA         | -0.281 (0.276) | 64 (74)                                | 213      | <b>&lt;0.001</b>  | -0.227 (0.892)  | 28 (59)                                | 628      | 0.053             |
|                   | AG         | 0.301 (0.439)  | 7 (23)                                 | 227      | <b>0.005</b>      | –               | –                                      | –        | –                 |
| Locomotory traits | PF         | 0.073 (0.544)  | 41 (97)                                | 2865     | 0.080             | 0.044 (0.815)   | 48 (97)                                | 2485     | 0.700             |
|                   | DF         | 0.062 (0.479)  | 32 (74)                                | 1669     | 0.130             | 0.016 (0.895)   | 28 (74)                                | 2485     | 0.304             |
|                   | SF         | -0.097 (0.556) | 35 (59)                                | 683      | 0.128             | -0.042 (0.908)  | 25 (59)                                | 913      | 0.836             |
|                   | PA         | 0.280 (0.487)  | 19 (74)                                | 2210     | <b>&lt;0.001</b>  | -0.581 (1.015)  | 38 (59)                                | 399      | <0.001            |
|                   | AG         | 0.246 (0.533)  | 8 (23)                                 | 195      | 0.086             | –               | –                                      | –        | –                 |
| Dispersal trait   | PF         | -0.195 (0.755) | 44 (97)                                | 2166     | 0.450             | 0.072 (0.752)   | 41 (97)                                | 2963     | <b>0.035</b>      |
|                   | DF         | -0.032 (0.607) | 33 (74)                                | 1480     | 0.620             | -0.081 (0.823)  | 34 (74)                                | 1337     | 0.788             |
|                   | SF         | -0.143 (0.595) | 26 (59)                                | 746      | 0.296             | 0.071 (0.843)   | 23 (59)                                | 1046     | 0.226             |
|                   | PA         | 0.375 (0.468)  | 12 (74)                                | 2394     | <b>&lt;0.001</b>  | 0.363 (0.691)   | 16 (59)                                | 1336     | <b>&lt;0.001</b>  |
|                   | AG         | 0.611 (0.427)  | 2 (23)                                 | 273      | <b>&lt;0.001</b>  | 0.059 (0.965)   | 1 (4)                                  | 6        | 0.875             |

**Table S8** Comparison of *FD* in disturbed habitats relative to primary forest for insectivore and frugivore communities (forest-dependent species), with analyses run separately for individual functional traits in different land-cover categories. Analyses are two-tailed Wilcoxon tests (i.e. testing whether observed values are significantly different from the null expectation in either direction). Bold denotes significant differences. The standardised effect size (SES) is provided along with the standard error (SE). Land-cover categories: primary forest (PF), disturbed primary forest (DF), secondary forest (SF), pasture (PF) and agriculture (AG). The number of communities statistically different from the null expectation are given (with the total number of communities for each test in brackets). Sample size may differ within categories because guild communities sometimes contained too few species to be included in analyses.

| Functional trait  | Land cover | Insectivores   |                                        |          |                   | Frugivores      |                                        |          |                   |
|-------------------|------------|----------------|----------------------------------------|----------|-------------------|-----------------|----------------------------------------|----------|-------------------|
|                   |            | Mean SES (SE)  | No. communities < expectation (sample) | <i>V</i> | Wilcoxon <i>P</i> | SES (mean + SE) | No. communities < expectation (sample) | <i>V</i> | Wilcoxon <i>P</i> |
| Body size         | PF         | -0.016 (0.812) | 36 (97)                                | 2907     | 0.057             | 0.018 (0.995)   | 30 (97)                                | 2798     | 0.130             |
|                   | DF         | 0.068 (0.758)  | 26 (74)                                | 1832     | <b>0.017</b>      | 0.128 (0.742)   | 31 (74)                                | 1649     | 0.160             |
|                   | SF         | 0.124 (0.689)  | 20 (49)                                | 1107     | 0.094             | -0.232 (0.912)  | 32 (49)                                | 669      | 0.104             |
|                   | PA         | -0.144 (0.690) | 36 (48)                                | 390      | <b>0.042</b>      | -0.712 (0.720)  | 46 (57)                                | 165      | <b>&lt;0.001</b>  |
|                   | AG         | —              | —                                      | —        | —                 | —               | —                                      | —        | —                 |
| Trophic traits    | PF         | 0.176 (0.701)  | 46 (97)                                | 3219     | <b>0.002</b>      | -0.116 (0.973)  | 47 (97)                                | 2038     | 0.224             |
|                   | DF         | -0.025 (0.605) | 47 (74)                                | 1364     | 0.901             | 0.091 (0.815)   | 31 (74)                                | 1495     | 0.564             |
|                   | SF         | -0.294 (0.619) | 44 (49)                                | 438      | <b>&lt;0.001</b>  | 0.042 (0.912)   | 24 (49)                                | 943      | 0.664             |
|                   | PA         | 0.119 (0.573)  | 18 (48)                                | 726      | 0.160             | -0.098 (0.910)  | 26 (57)                                | 682      | 0.253             |
|                   | AG         | —              | —                                      | —        | —                 | —               | —                                      | —        | —                 |
| Locomotory traits | PF         | 0.060 (0.691)  | 40 (97)                                | 2921     | 0.050             | 0.239 (0.776)   | 40 (97)                                | 3126     | <b>0.007</b>      |
|                   | DF         | 0.100 (0.603)  | 32 (74)                                | 1753     | <b>0.049</b>      | -0.143 (0.854)  | 39 (74)                                | 1186     | 0.279             |
|                   | SF         | -0.032 (0.638) | 29 (49)                                | 979      | 0.480             | -0.452 (0.795)  | 42 (49)                                | 398      | <b>&lt;0.001</b>  |
|                   | PA         | -0.512 (0.803) | 34 (48)                                | 259      | <b>&lt;0.001</b>  | -0.632 (1.047)  | 47 (57)                                | 363      | <b>&lt;0.001</b>  |
|                   | AG         | —              | —                                      | —        | —                 | —               | —                                      | —        | —                 |
| Dispersal traits  | PF         | -0.509 (1.120) | 58 (97)                                | 1526     | <b>0.002</b>      | 0.011 (0.914)   | 41 (97)                                | 2725     | <b>0.211</b>      |
|                   | DF         | -0.101 (0.769) | 35 (74)                                | 1339     | 0.796             | -0.015 (0.994)  | 31 (74)                                | 1575     | 0.314             |
|                   | SF         | -0.067 (0.849) | 26 (49)                                | 835      | 0.709             | 0.092 (1.009)   | 36 (49)                                | 1058     | 0.193             |
|                   | PA         | 0.545 (0.745)  | 18 (48)                                | 968      | <b>&lt;0.001</b>  | 0.303 (0.747)   | 14 (57)                                | 1151     | <b>0.010</b>      |
|                   | AG         | —              | —                                      | —        | —                 | —               | —                                      | —        | —                 |



**Table S9** Comparison of *FD* in disturbed habitats relative to primary forest for insectivore and frugivore communities (non-forest species), with analyses run separately for individual functional traits in different land-cover categories. Analyses are two-tailed Wilcoxon tests (i.e. testing whether observed values are significantly different from the null expectation in either direction). Bold denotes significant differences. The standardised effect size (SES) is provided along with the standard error (SE). Analyses were run separately for individual functional traits in different land-cover categories: forest (PF), disturbed primary forest (DF), secondary forest (SF), pasture (PA) and agriculture (AG). The number of communities statistically different from the null expectation are given (with the total number of communities for each test in brackets). Sample size may differ within categories because guild communities sometimes contained too few species to be included in analyses.

| Functional trait  | Land cover | Insectivores   |                                        |          |                   | Frugivores      |                                        |          |                   |
|-------------------|------------|----------------|----------------------------------------|----------|-------------------|-----------------|----------------------------------------|----------|-------------------|
|                   |            | Mean SES (SE)  | No. communities < expectation (sample) | <i>V</i> | Wilcoxon <i>P</i> | SES (mean + SE) | No. communities < expectation (sample) | <i>V</i> | Wilcoxon <i>P</i> |
| Body size         | PF         | 0.493 (1.084)  | 7 (17)                                 | 110      | 0.120             | –               | –                                      | –        | –                 |
|                   | DF         | 0.389 (0.971)  | 17 (41)                                | 601      | 0.027             | 0.047 (0.936)   | 4 (8)                                  | 18       | <b>1</b>          |
|                   | SF         | -0.571 (1.018) | 31 (46)                                | 239      | <0.001            | -0.098 (1.004)  | 15 (22)                                | 103      | 0.463             |
|                   | PA         | 0.170 (0.847)  | 22 (74)                                | 1884     | <b>0.008</b>      | 0.495 (0.732)   | 2 (10)                                 | 48       | <b>0.037</b>      |
|                   | AG         | 0.256 (0.918)  | 8 (23)                                 | 184      | 0.170             | –               | –                                      | –        | –                 |
| Trophic traits    | PF         | 0.674 (1.536)  | 5 (17)                                 | 110      | <b>0.120</b>      | –               | –                                      | –        | –                 |
|                   | DF         | 0.105 (1.099)  | 19 (41)                                | 450      | 0.808             | -0.261 (1.131)  | 5 (8)                                  | 16       | 0.844             |
|                   | SF         | 0.237 (1.019)  | 22 (46)                                | 640      | <b>0.282</b>      | -0.193 (1.011)  | 14 (22)                                | 97       | 0.354             |
|                   | PA         | -0.168 (0.548) | 50 (74)                                | 854      | 0.004             | 0.354 (1.022)   | 4 (10)                                 | 40       | 0.232             |
|                   | AG         | 0.236 (0.516)  | 9 (23)                                 | 199      | 0.065             | –               | –                                      | –        | –                 |
| Locomotory traits | PF         | -0.067 (0.995) | 10 (17)                                | 68       | 0.712             | –               | –                                      | –        | –                 |
|                   | DF         | -0.307 (0.766) | 31 (41)                                | 257      | <b>0.024</b>      | 0.130 (0.881)   | 4 (8)                                  | 20       | 0.844             |
|                   | SF         | 0.050 (0.925)  | 23 (46)                                | 606      | 0.481             | -0.382 (0.976)  | 15 (22)                                | 75       | 0.098             |
|                   | PA         | 0.197 (1.232)  | 39 (74)                                | 1482     | 0.613             | 0.670 (0.962)   | 2 (10)                                 | 44       | 0.106             |
|                   | AG         | 0.218 (0.818)  | 12 (23)                                | 150      | 0.731             | –               | –                                      | –        | –                 |
| Dispersal trait   | PF         | -0.304 (0.815) | 14 (17)                                | 39       | <b>0.080</b>      | –               | –                                      | –        | –                 |
|                   | DF         | -0.134 (0.934) | 27 (41)                                | 304      | 0.103             | 0.109 (0.916)   | 3 (8)                                  | 19       | 0.945             |
|                   | SF         | -0.210 (1.082) | 27 (46)                                | 399      | 0.124             | -0.367 (0.941)  | 11 (22)                                | 96       | 0.337             |
|                   | PA         | 0.196 (1.204)  | 27 (74)                                | 1627     | <b>0.198</b>      | 0.580 (0.950)   | 3 (10)                                 | 46       | <b>0.064</b>      |
|                   | AG         | 0.883 (1.030)  | 4 (23)                                 | 246      | <0.001            | –               | –                                      | –        | –                 |

**Table S10** Comparison of raw *FDis* in disturbed habitats relative to primary forest for insectivore and frugivore communities (all species), with analyses run separately for individual functional traits. Analyses are two-tailed Wilcoxon tests (i.e. testing whether observed values are significantly different from the null expectation in either direction). Bold denotes significant differences. Analyses were run separately for individual functional traits in different land-uses: PF (Primary forest), DF (Disturbed primary forest), SF (Secondary forest), PA (Pasture), AG (Agriculture).

| Functional trait  | Land cover comparison | Insectivores |                   | Frugivores |                   |
|-------------------|-----------------------|--------------|-------------------|------------|-------------------|
|                   |                       | <i>V</i>     | Wilcoxon <i>P</i> | <i>V</i>   | Wilcoxon <i>P</i> |
| Body size         | PF vs DF              | 3347         | 0.452             | 3469       | 0.710             |
|                   | PF vs SF              | 3680         | 0.003             | 4131       | <b>&lt;0.001</b>  |
|                   | PF vs PA              | 3913         | 0.313             | 6250       | <b>&lt;0.001</b>  |
|                   | PF vs AG              | 1261         | 0.531             | 1109       | <b>&lt;0.001</b>  |
|                   | DF vs SF              | 2892         | <b>0.001</b>      | 3216       | <b>&lt;0.001</b>  |
|                   | DF vs PA              | 3153         | 0.112             | 4803       | <b>&lt;0.001</b>  |
|                   | DF vs AG              | 974          | 0.480             | 853        | <b>&lt;0.001</b>  |
|                   | SF vs PA              | 1775         | 0.065             | 3353       | <b>&lt;0.001</b>  |
|                   | SF vs AG              | 713          | 0.964             | 638        | <b>&lt;0.001</b>  |
|                   | PA vs AG              | 923          | 0.776             | 625        | <b>0.005</b>      |
| Trophic traits    | PF vs DF              | 4059         | 0.143             | 3157       | 0.179             |
|                   | PF vs SF              | 4408         | <b>&lt;0.001</b>  | 3867       | <b>&lt;0.001</b>  |
|                   | PF vs PA              | 5474         | <b>&lt;0.001</b>  | 4410       | <b>&lt;0.001</b>  |
|                   | PF vs AG              | 1484         | <b>0.038</b>      | 970        | <b>&lt;0.001</b>  |
|                   | DF vs SF              | 3189         | <b>&lt;0.001</b>  | 3143       | <b>&lt;0.001</b>  |
|                   | DF vs PA              | 3961         | <b>&lt;0.001</b>  | 3566       | <b>&lt;0.001</b>  |
|                   | DF vs AG              | 1086         | 0.103             | 754        | <b>&lt;0.001</b>  |
|                   | SF vs PA              | 2006         | 0.424             | 2417       | 0.068             |
|                   | SF vs AG              | 666          | 0.677             | 590        | <b>&lt;0.001</b>  |
|                   | PA vs AG              | 889          | 0.997             | 610        | 0.009             |
| Locomotory traits | PF vs DF              | 3768         | 0.578             | 3979       | 0.225             |
|                   | PF vs SF              | 3315         | 0.098             | 3050       | 0.492             |
|                   | PF vs PA              | 2467         | <b>&lt;0.001</b>  | 5716       | <b>&lt;0.001</b>  |
|                   | PF vs AG              | 641          | <b>0.001</b>      | 1115       | <b>&lt;0.001</b>  |
|                   | DF vs SF              | 2464         | 0.204             | 2134       | 0.826             |
|                   | DF vs PA              | 1745         | <b>&lt;0.001</b>  | 4188       | <b>&lt;0.001</b>  |
|                   | DF vs AG              | 454          | <b>&lt;0.001</b>  | 840        | <b>&lt;0.001</b>  |
|                   | SF vs PA              | 1297         | <b>&lt;0.001</b>  | 3373       | <b>&lt;0.001</b>  |
|                   | SF vs AG              | 349          | <b>&lt;0.001</b>  | 667        | <b>&lt;0.001</b>  |
|                   | PA vs AG              | 780          | 0.375             | 643        | <b>0.002</b>      |
| Dispersal traits  | PF vs DF              | 3020         | 0.076             | 4104       | 0.109             |
|                   | PF vs SF              | 3214         | 0.198             | 3909       | <b>&lt;0.001</b>  |
|                   | PF vs PA              | 1130         | <b>&lt;0.001</b>  | 4641       | <b>&lt;0.001</b>  |
|                   | PF vs AG              | 202          | <b>&lt;0.001</b>  | 1084       | <b>&lt;0.001</b>  |
|                   | DF vs SF              | 2653         | <b>0.033</b>      | 2559       | <b>0.089</b>      |
|                   | DF vs PA              | 1193         | <b>&lt;0.001</b>  | 3288       | <b>0.003</b>      |
|                   | DF vs AG              | 197          | <b>&lt;0.001</b>  | 824        | <b>&lt;0.001</b>  |
|                   | SF vs PA              | 860          | <b>&lt;0.001</b>  | 2413       | <b>0.071</b>      |
|                   | SF vs AG              | 139          | <b>&lt;0.001</b>  | 649        | <b>&lt;0.001</b>  |
|                   | PA vs AG              | 520          | <b>0.002</b>      | 683        | <b>&lt;0.001</b>  |

**Table S11** Comparison of raw *FDis* in disturbed habitats relative to primary forest for insectivore and frugivore communities (forest-dependent species), with analyses run separately for individual functional traits. Analyses are two-tailed Wilcoxon tests (i.e. testing whether observed values are significantly different from the null expectation in either direction). Bold denotes significant differences. Land-cover categories: PF (Primary forest), DF (Disturbed primary forest), SF (Secondary forest), PA (Pasture), AG (Agriculture).

| Functional trait  | Land cover comparison | Insectivores |                   | Frugivores |                   |
|-------------------|-----------------------|--------------|-------------------|------------|-------------------|
|                   |                       | <i>V</i>     | Wilcoxon <i>P</i> | <i>V</i>   | Wilcoxon <i>P</i> |
| Body size         | PF vs DF              | 3454         | 0.675             | 3365       | 0.486             |
|                   | PF vs SF              | 3632         | <b>0.005</b>      | 3930       | <b>&lt;0.001</b>  |
|                   | PF vs PA              | 5763         | <b>&lt;0.001</b>  | 5975       | <b>&lt;0.001</b>  |
|                   | PF vs AG              | 1646         | <b>&lt;0.001</b>  | 1109       | <b>&lt;0.001</b>  |
|                   | DF vs SF              | 2776         | <b>0.007</b>      | 3124       | <b>&lt;0.001</b>  |
|                   | DF vs PA              | 4401         | <b>&lt;0.001</b>  | 4634       | <b>&lt;0.001</b>  |
|                   | DF vs AG              | 1252         | <b>&lt;0.001</b>  | 857        | <b>&lt;0.001</b>  |
|                   | SF vs PA              | 3299         | <b>&lt;0.001</b>  | 3218       | <b>&lt;0.001</b>  |
|                   | SF vs AG              | 979          | <b>&lt;0.001</b>  | 646        | <b>&lt;0.001</b>  |
|                   | PA vs AG              | 904          | <b>&lt;0.001</b>  | 615        | <b>0.003</b>      |
| Trophic traits    | PF vs DF              | 3933         | 0.284             | 3028       | 0.081             |
|                   | PF vs SF              | 4695         | <b>&lt;0.001</b>  | 3637       | <b>0.005</b>      |
|                   | PF vs PA              | 6554         | <b>&lt;0.001</b>  | 4091       | <b>0.005</b>      |
|                   | PF vs AG              | 1649         | <b>&lt;0.001</b>  | 971        | <b>&lt;0.001</b>  |
|                   | DF vs SF              | 3468         | <b>&lt;0.001</b>  | 2994       | <b>&lt;0.001</b>  |
|                   | DF vs PA              | 4956         | <b>&lt;0.001</b>  | 3348       | <b>&lt;0.001</b>  |
|                   | DF vs AG              | 1258         | <b>&lt;0.001</b>  | 756        | <b>&lt;0.001</b>  |
|                   | SF vs PA              | 3404         | <b>&lt;0.001</b>  | 2333       | 0.082             |
|                   | SF vs AG              | 994          | <b>&lt;0.001</b>  | 590        | <b>&lt;0.001</b>  |
|                   | PA vs AG              | 946          | <b>&lt;0.001</b>  | 596        | <b>0.008</b>      |
| Locomotory traits | PF vs DF              | 3492         | 0.764             | 4361       | <b>0.016</b>      |
|                   | PF vs SF              | 2895         | 0.904             | 3482       | <b>0.023</b>      |
|                   | PF vs PA              | 5147         | <b>&lt;0.001</b>  | 5768       | <b>&lt;0.001</b>  |
|                   | PF vs AG              | 1649         | <b>&lt;0.001</b>  | 1112       | <b>&lt;0.001</b>  |
|                   | DF vs SF              | 2250         | 0.763             | 2364       | 0.415             |
|                   | DF vs PA              | 3932         | <b>&lt;0.001</b>  | 4129       | <b>&lt;0.001</b>  |
|                   | DF vs AG              | 1258         | <b>&lt;0.001</b>  | 831        | <b>&lt;0.001</b>  |
|                   | SF vs PA              | 3160         | <b>&lt;0.001</b>  | 3080       | <b>&lt;0.001</b>  |
|                   | SF vs AG              | 1003         | <b>&lt;0.001</b>  | 645        | <b>&lt;0.001</b>  |
|                   | PA vs AG              | 958          | <b>&lt;0.001</b>  | 614        | <b>0.004</b>      |
| Dispersal trait   | PF vs DF              | 2904         | <b>0.033</b>      | 4210       | 0.053             |
|                   | PF vs SF              | 2845         | 0.953             | 3922       | <b>&lt;0.001</b>  |
|                   | PF vs PA              | 2601         | <b>0.010</b>      | 5038       | <b>&lt;0.001</b>  |
|                   | PF vs AG              | 1358         | <b>&lt;0.001</b>  | 1085       | <b>&lt;0.001</b>  |
|                   | DF vs SF              | 2410         | 0.305             | 2566       | <b>0.084</b>      |
|                   | DF vs PA              | 2106         | 0.053             | 3553       | <b>&lt;0.001</b>  |
|                   | DF vs AG              | 1054         | <b>&lt;0.001</b>  | 819        | <b>&lt;0.001</b>  |
|                   | SF vs PA              | 1885         | 0.395             | 2619       | <b>0.002</b>      |
|                   | SF vs AG              | 862          | <b>&lt;0.001</b>  | 644        | <b>&lt;0.001</b>  |
|                   | PA vs AG              | 916          | <b>&lt;0.001</b>  | 649        | <b>&lt;0.001</b>  |

**Table S12** Comparison of raw *FDis* in disturbed habitats relative to primary forest for insectivore and frugivore communities (non-forest species), with analyses run separately for individual functional traits. Analyses are two-tailed Wilcoxon tests (i.e. testing whether observed values are significantly different from the null expectation in either direction). Bold denotes significant differences. Land-cover categories: PF (Primary forest), DF (Disturbed primary forest), SF (Secondary forest), PA (Pasture), AG (Agriculture).

| Functional trait  | Land-cover comparison | Insectivores |                   | Frugivores |                   |
|-------------------|-----------------------|--------------|-------------------|------------|-------------------|
|                   |                       | <i>V</i>     | Wilcoxon <i>P</i> | <i>V</i>   | Wilcoxon <i>P</i> |
| Body size         | PF vs DF              | 762          | <b>&lt;0.001</b>  | 126        | 0.049             |
|                   | PF vs SF              | 600          | <b>&lt;0.001</b>  | 144        | <b>0.004</b>      |
|                   | PF vs PA              | 389          | <b>&lt;0.001</b>  | 138        | <b>0.036</b>      |
|                   | PF vs AG              | 170          | <b>&lt;0.001</b>  | —          | —                 |
|                   | DF vs SF              | 1548         | 0.918             | 546        | 0.137             |
|                   | DF vs PA              | 1475         | <b>0.002</b>      | 462        | 0.772             |
|                   | DF vs AG              | 489          | <b>0.034</b>      | —          | —                 |
|                   | SF vs PA              | 1136         | <b>&lt;0.001</b>  | 864        | 0.242             |
|                   | SF vs AG              | 470          | 0.054             | —          | —                 |
|                   | PA vs AG              | 906          | 0.885             | —          | —                 |
| Trophic traits    | PF vs DF              | 834          | <b>0.002</b>      | 126        | 0.049             |
|                   | PF vs SF              | 521          | <b>&lt;0.001</b>  | 144        | <b>0.004</b>      |
|                   | PF vs PA              | 452          | <b>&lt;0.001</b>  | 138        | <b>0.036</b>      |
|                   | PF vs AG              | 179          | <b>&lt;0.001</b>  | —          | —                 |
|                   | DF vs SF              | 1098         | <b>0.006</b>      | 540        | 0.118             |
|                   | DF vs PA              | 1317         | <b>&lt;0.001</b>  | 460        | 0.745             |
|                   | DF vs AG              | 417          | <b>0.004</b>      | —          | —                 |
|                   | SF vs PA              | 1929         | 0.741             | 855        | 0.285             |
|                   | SF vs AG              | 567          | 0.383             | —          | —                 |
|                   | PA vs AG              | 896          | 0.951             | —          | —                 |
| Locomotory traits | PF vs DF              | 871          | <b>0.004</b>      | 126        | 0.049             |
|                   | PF vs SF              | 603          | <b>&lt;0.001</b>  | 144        | <b>0.004</b>      |
|                   | PF vs PA              | 430          | <b>&lt;0.001</b>  | 138        | <b>0.036</b>      |
|                   | PF vs AG              | 168          | <b>&lt;0.001</b>  | —          | —                 |
|                   | DF vs SF              | 1180         | <b>0.024</b>      | 553        | 0.161             |
|                   | DF vs PA              | 753          | <b>&lt;0.001</b>  | 469        | 0.867             |
|                   | DF vs AG              | 302          | <b>&lt;0.001</b>  | —          | —                 |
|                   | SF vs PA              | 1106         | <b>&lt;0.001</b>  | 867        | 0.229             |
|                   | SF vs AG              | 369          | <b>0.003</b>      | —          | —                 |
|                   | PA vs AG              | 839          | 0.689             | —          | —                 |
| Dispersal trait   | PF vs DF              | 815          | <b>0.001</b>      | 126        | 0.049             |
|                   | PF vs SF              | 561          | <b>&lt;0.001</b>  | 144        | <b>0.004</b>      |
|                   | PF vs PA              | 282          | <b>&lt;0.001</b>  | 138        | <b>0.036</b>      |
|                   | PF vs AG              | 84           | <b>&lt;0.001</b>  | —          | —                 |
|                   | DF vs SF              | 1298         | <b>&lt;0.001</b>  | 547        | 0.140             |
|                   | DF vs PA              | 763          | <b>&lt;0.001</b>  | 450        | 0.616             |
|                   | DF vs AG              | 223          | <b>&lt;0.001</b>  | —          | —                 |
|                   | SF vs PA              | 946          | <b>&lt;0.001</b>  | 818        | 0.513             |
|                   | SF vs AG              | 244          | <b>&lt;0.001</b>  | —          | —                 |
|                   | PA vs AG              | 563          | <b>0.007</b>      | —          | —                 |

**Table S13** The effect of habitat disturbance on functional traits in insectivorous and frugivorous birds in Amazonia. Separate analyses are conducted on forest and non-forest species. Results are from a Generalised Linear Model, with the final model chosen based upon the lowest AIC value. The initial ‘global’ model included a quadratic explanatory variable (Environmental<sup>2</sup>). Guilds: IN = insectivores; FR = frugivores.

| Community type | Guild | Functional trait | Explanatory variable       | Estimate (S.E.) | <i>t</i> | <i>P</i>         |
|----------------|-------|------------------|----------------------------|-----------------|----------|------------------|
| Forest         | IN    | Body size        | Environmental              | 0.099 (0.015)   | 6.384    | <b>&lt;0.001</b> |
|                |       | Dispersal        | Environmental              | -0.103 (0.006)  | -17.762  | <b>&lt;0.001</b> |
|                |       |                  | Environmental <sup>2</sup> | 0.048 (0.006)   | 8.139    | <b>&lt;0.001</b> |
|                |       | Trophic          | Environmental              | 0.115 (0.006)   | 20.264   | <b>&lt;0.001</b> |
|                |       |                  | Environmental <sup>2</sup> | -0.035 (0.006)  | -5.944   | <b>&lt;0.001</b> |
|                |       | Locomotory       | Environmental              | 0.155 (0.009)   | 16.360   | <b>&lt;0.001</b> |
|                |       |                  | Environmental <sup>2</sup> | -0.075 (0.010)  | -7.840   | <b>&lt;0.001</b> |
|                |       | Dispersal        | Environmental              | -0.008 (0.003)  | -1.058   | <b>0.010</b>     |
|                |       | Trophic          | Environmental              | 0.086 (0.010)   | 8.796    | <b>&lt;0.001</b> |
|                |       | Body size        | Environmental              | 0.153 (0.022)   | 6.968    | <b>&lt;0.001</b> |
| Non-Forest     | FR    | Locomotory       | Environmental              | -0.009 (0.003)  | -2.710   | <b>0.007</b>     |
|                |       | Dispersal        | Environmental              | 0.191 (0.412)   | 1.706    | 0.089            |
|                |       |                  | Environmental <sup>2</sup> | 0.553 (0.441)   | 4.600    | <b>&lt;0.001</b> |
|                |       | Trophic          | Environmental              | 0.037 (0.016)   | 2.327    | <b>0.021</b>     |
|                |       |                  | Environmental <sup>2</sup> | 0.237 (0.052)   | 4.537    | <b>&lt;0.001</b> |
|                |       | Body size        | Environmental              | 0.162 (0.056)   | 2.904    | <b>0.003</b>     |
|                |       |                  | Environmental <sup>2</sup> | -0.026 (0.016)  | -1.622   | 0.106            |
|                |       | Locomotory       | Environmental              | -0.078 (0.015)  | -5.238   | <b>&lt;0.001</b> |
|                |       | Dispersal        | Environmental              | 0.043 (0.015)   | 2.903    | <b>0.004</b>     |
|                |       | Trophic          | Environmental              | -0.037 (0.040)  | -0.928   | 0.356            |
|                |       | Body size        | Environmental              | 0.135 (0.036)   | 3.711    | <b>&lt;0.001</b> |
|                |       |                  | Environmental <sup>2</sup> | 0.192 (0.025)   | 7.680    | <b>&lt;0.001</b> |
|                |       | Locomotory       | Environmental              |                 |          |                  |
|                |       |                  |                            |                 |          |                  |
